# Supplementary material for: The Association of Procalcitonin and C-Reactive Protein with Bacterial Infections Acquired during Intensive Care Unit Stay in COVID-19 Critically Ill Patients
Source: MDPI journal article supplement (doi:10.3390/antibiotics12101536), 2023-10-12
Supplement: s1 [file s1]

**Table S1.** CRP and PCT values at and after infection diagnosis.

|                                      | <b>All Patients</b><br><b>(n = 279)</b> | <b>No Infection</b><br><b>(n = 110)</b> | <b>Yes Infection</b><br><b>(n = 169)</b> | <b>p Value</b> |
|--------------------------------------|-----------------------------------------|-----------------------------------------|------------------------------------------|----------------|
| <b>PCT D -1 (ng/mL; median, IQR)</b> | 0.1 (0.1–0.3)                           | 0.1 (0.1–0.1)                           | 0.2 (0.1–0.4)                            | <0.001         |
| <b>PCT D +0 (ng/mL; median, IQR)</b> | 0.2 (0.1–0.6)                           | 0.1 (0.1–0.1)                           | 0.3 (0.1–1.0)                            | <0.001         |
| <b>PCT D +1 (ng/mL; median, IQR)</b> | 0.3 (0.1–0.9)                           | 0.1 (0.1–0.2)                           | 0.4 (0.2–1.2)                            | <0.001         |
| <b>CRP D -1 (mg/dL; median, IQR)</b> | 1.2 (0.1–4.7)                           | 0.4 (0.1–2.1)                           | 2.1 (0.5–7.2)                            | <0.001         |
| <b>CRP D +0 (mg/dL; median, IQR)</b> | 1.8 (0.3–5.8)                           | 0.4 (0.1–2.2)                           | 3.2 (1.2–12.8)                           | <0.001         |
| <b>CRP D +1 (mg/dL; median, IQR)</b> | 1.6 (0.1–6.2)                           | 0.2 (0.1–1.2)                           | 3.9 (1.1–16.7)                           | <0.001         |

D -1: Day before infection or day 10 after ICU admission; D +0: day of infection diagnosis or day 11 after ICU admission, D + 1 the day after diagnosis of infection or day 12 after ICU admission.

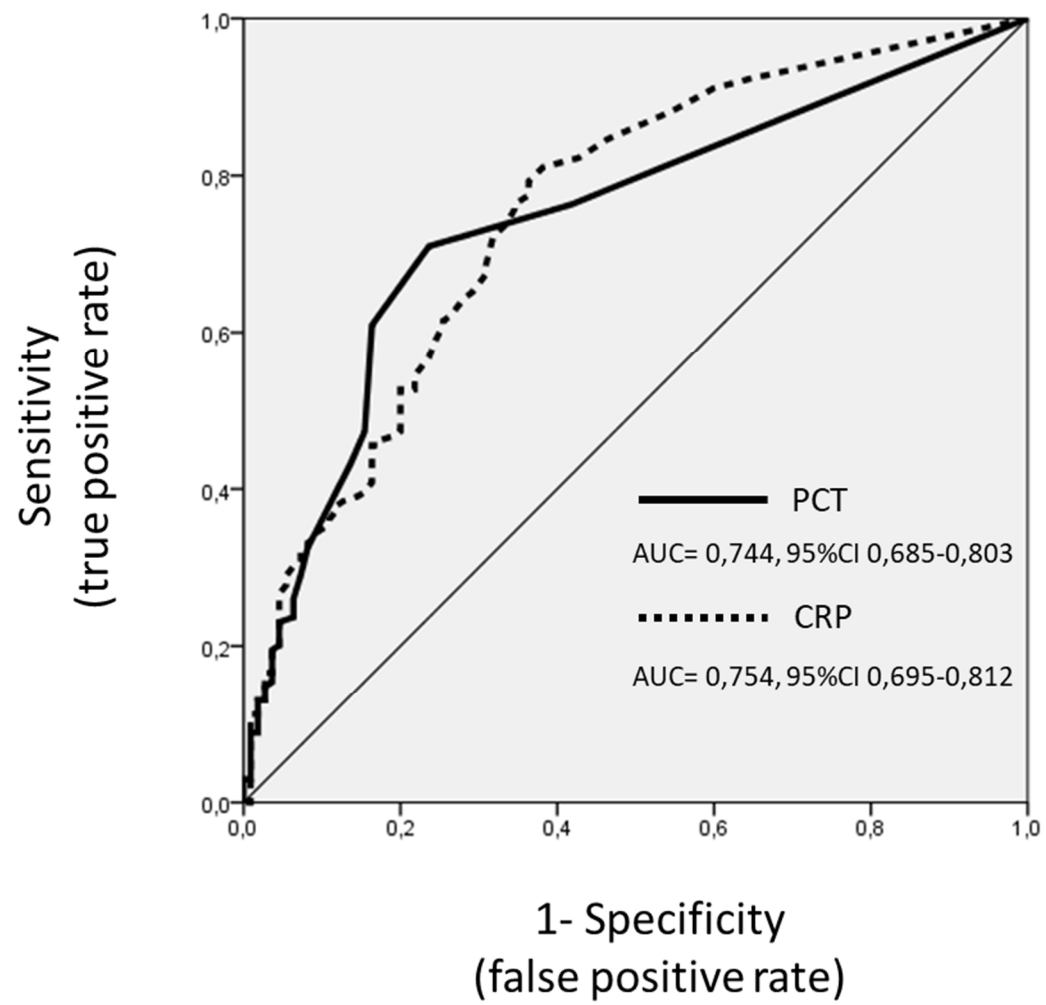

**Figure S1.** Receiver operating characteristic curve for PCT (solid line) and CRP (dotted line).

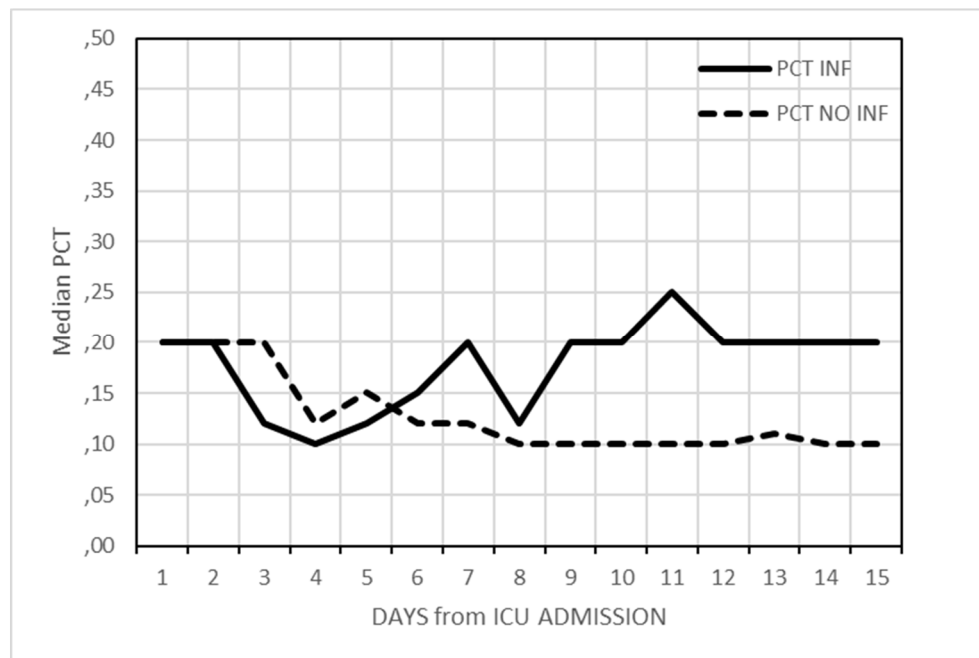

**Figure S2.** Median PCT values in patients with and without infections acquired in ICU in the first 14 days after ICU admission.

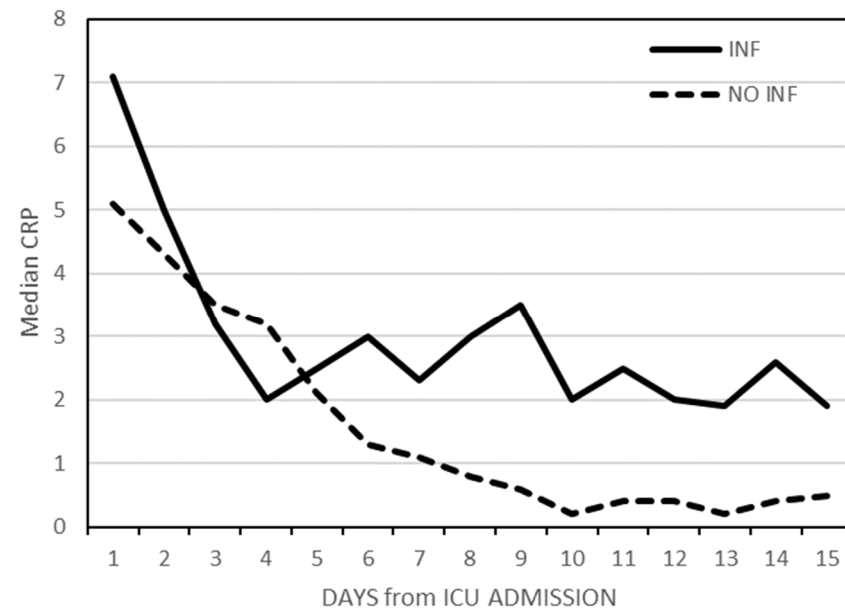

**Figure S3.** Median CRP values in patients with and without infections acquired in ICU in the first 14 days after ICU admission.
